# Supplementary material for: Dielectric barrier discharge-plasma induced vaporization and its application to the determination of mercury by atomic fluorescence spectrometry
Source: Royal Society of Chemistry journal article supplement (doi:10.1039/c1an15332c), 2011-01-01
Supplement: c1an15332c.pdf [file c1an15332c.pdf]

## Electronic supplementary information

Dielectric barrier discharge-plasma induced vaporization and its application to the determination of mercury by atomic fluorescence spectrometry

Zhifu Liu, Zhenli Zhu\*, Qingju Wu, Shenghong Hu, Hongtao Zheng

State Key Laboratory of Biogeology and Environmental Geology, Faculty of Earth Sciences,  
China University of Geosciences, Wuhan, China, 430074

Email: zhuzl03@gmail.com

## Figures

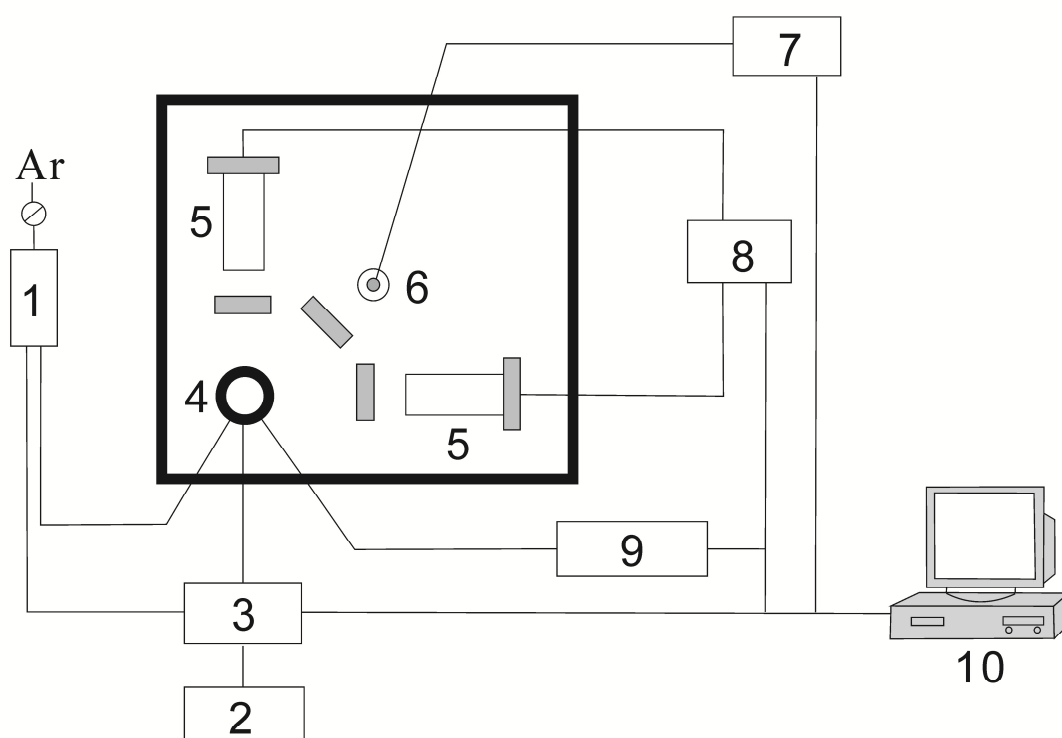

Fig. S1 Schematic diagram of the AFS-9130. (1. carrier gas supply, 2 DBD power supply, 3. DBD-PIV system, 4. atomizer, 5. hollow cathode lamp, 6. photomultiplier, 7. photomultiplier voltage, 8. lamp power supply, 9. furnace temperature controller, 10. computer)
